# Supplementary material
Source: Springer Nature journal article supplement (https://www.springermedizin.de/resource/supplementary/12984_2011_378_MOESM5_ESM.pdf/9605890)

a) Upward tract

- Healthy  
- Dystonic

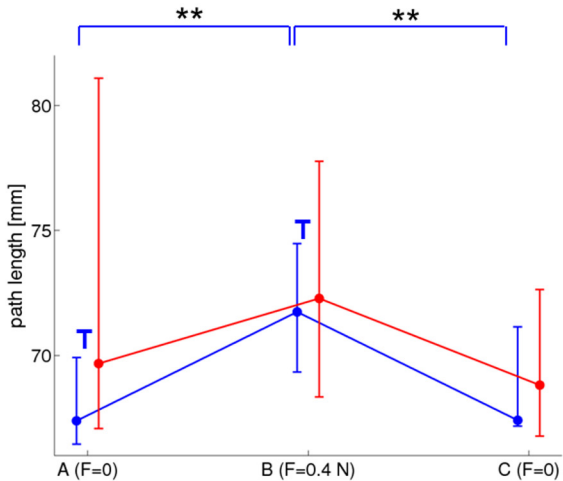

b) Downward tract

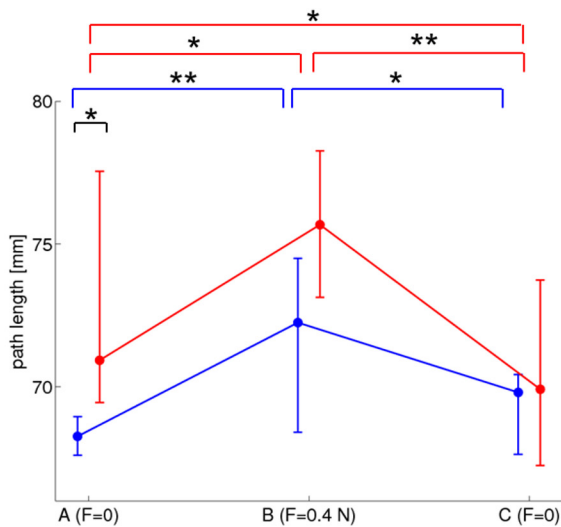

c) Horizontal tract

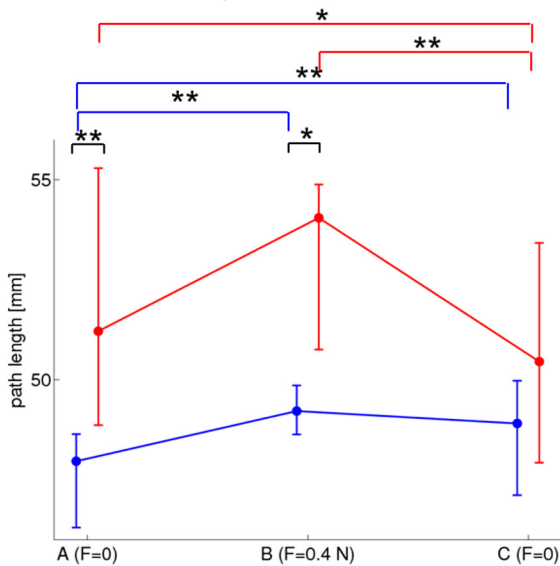

d) Circular path

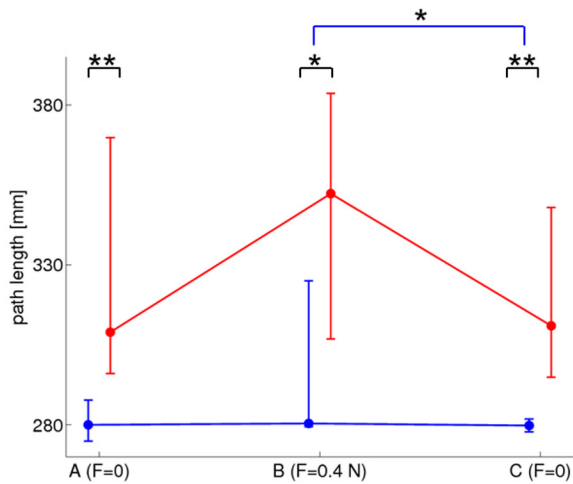

Supplement: MOESM5 [file 9605890]
